# Supplementary figures and images for: Bichromatic particle streak velocimetry bPSV
Source: Springer Nature journal article supplement (doi:10.1007/s00348-012-1355-8), 2012-08-31

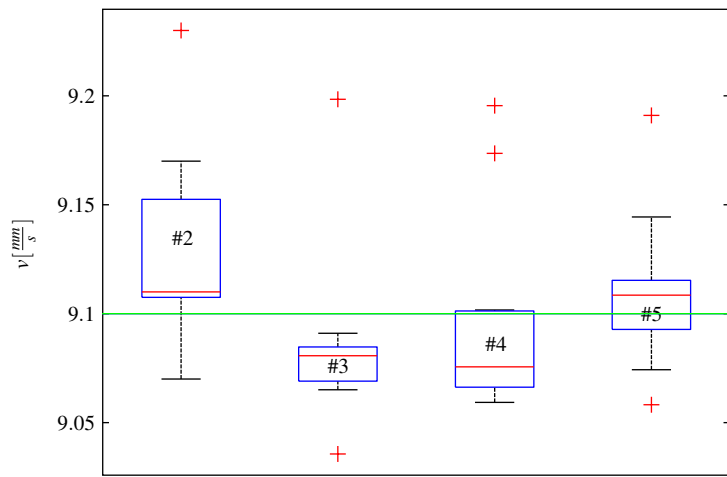

Supplement: MOESM2 [file 5235786]
